# Supplementary material
Source: HighWire-hosted journal article supplement (https://bibliotheek.ehb.be/content/76/4/243)
Supplement: inline-supplementary-material-1 [file inline-supplementary-material-1.pdf]

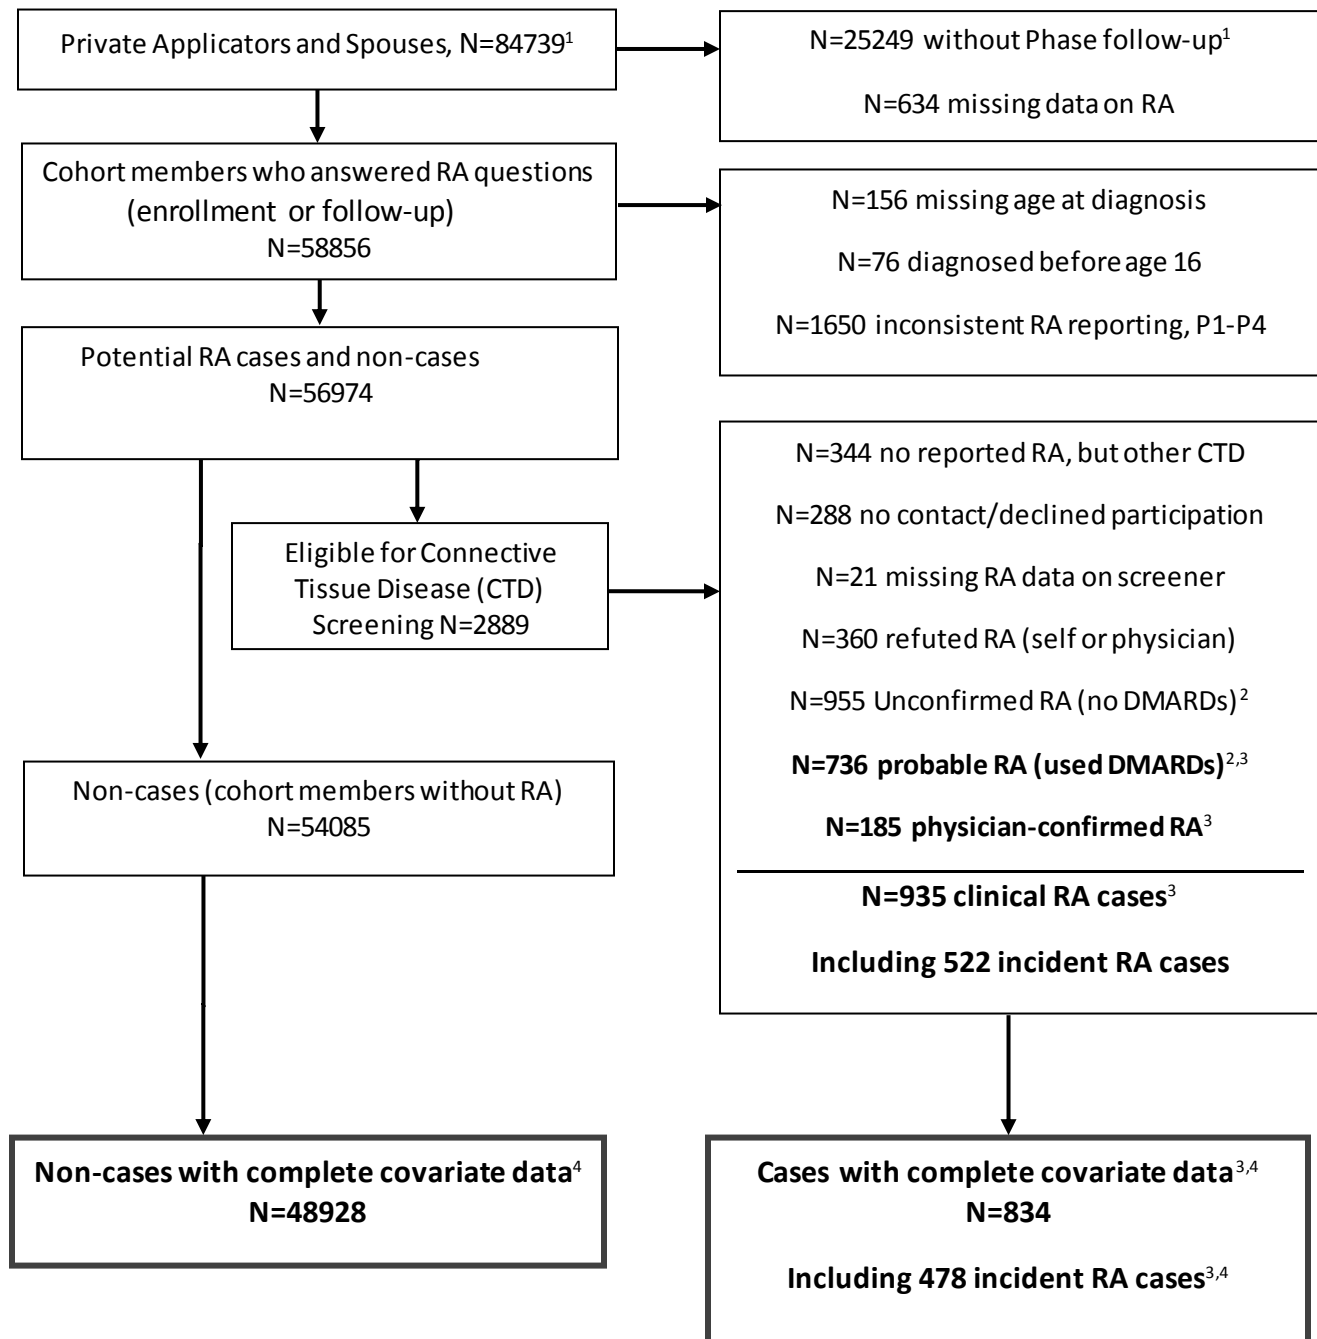

Supplemental Figure 1. Identification of incident RA cases and non-cases

<sup>1</sup>Questions on prevalent RA were asked of all spouses and 44% of enrolled applicators who completed a take-home questionnaire at Phase 1 (1993-1997). Of those, RA was reported by 5%; among those missing phase follow-up data, 6% reported RA.

<sup>2</sup>Disease modifying anti-rheumatic drugs (DMARDs)

<sup>3</sup>Incident RA cases were identified during follow-up surveys in 1999-2003 (Phase 2), 2005 to 2010 (Phase 3), and 2013 to 2015 (Phase 4). Only spouses were asked about RA and related connective tissue diseases (CTD) in Phase 2, while all participants were asked in Phases 3 and 4. Of the total of 935 clinical RA cases were identified by CTD screening, 736 were confirmed as probable cases based on reported DMARD use, and 185 were confirmed by physician report or medical records review. Of these, 478 were incident and had complete data on baseline covariates: 125 (26%) were incident by Phase 2, 160 (33%) by Phase 3, and 190 (40%) by Phase 4, while 3 were incident compared to enrollment, but the relative timing of diagnosis could not be determined.

<sup>4</sup>Base model covariates, including age, state, packyears, education

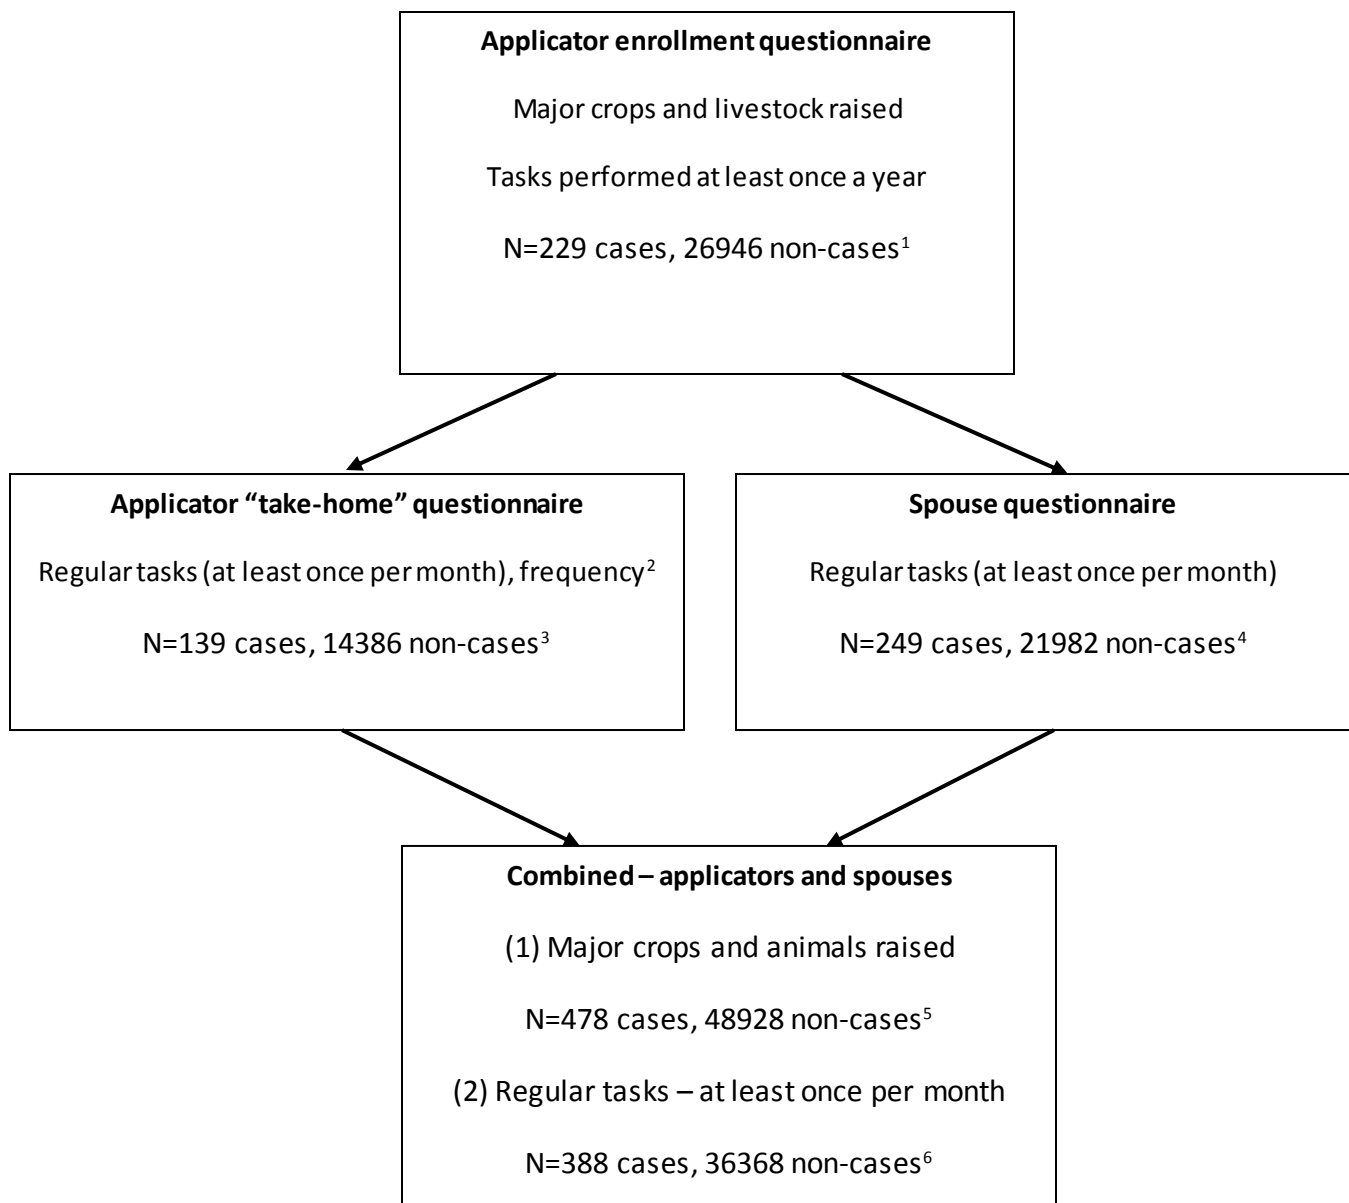

Supplemental Figure 2. Data elements and sample for applicators, spouses, and combined analysis

<sup>1</sup>Complete data on pesticides covariates and diagnosis age on enrolled applicators available for 196 cases and 24357 non-cases.

<sup>2</sup>Frequency in the last growing season of field work (e.g. planting, driving combines or mechanical harvesters: never, 1-10 days, 11-30 days, 31-100 days, >100 days; applying natural fertilizer or chemical fertilizer, handpicking crops: never, 1-5 days, 6-25 days, 26-50 days, and

more than 50 days), and other tasks (e.g., grinding feed and repairing engines), in the summer and in the winter, and how often (i.e., never or less than once per month, monthly, weekly (1-5 times per week), or daily (6-7 days per week). Analysis variables were based on the highest frequency level reported in either season.

<sup>3</sup>Complete data on pesticides covariates and diagnosis age on applicators from the “take-home” questionnaire available for 120 cases and 13436 non-cases.

<sup>4</sup>Complete data on pesticides covariates and diagnosis age on enrolled spouses available for 231 cases and 20842 non-cases.

<sup>5</sup>Complete data on pesticides covariates and diagnosis age available for the combined sample of 427 cases and 45199 non-cases, including all enrolled applicators (196 cases and 24357 non-cases) and spouses (231 cases and 20842 non-cases).

<sup>6</sup>Complete data on pesticides covariates and diagnosis age on the combined sample of applicators who completed the “take home” questionnaire (120 cases and 13436 non-cases) and all spouses (231 cases and 20842 non-cases).

Supplemental Table 1. Incident RA in relation to crops and livestock at enrollment, stratified by applicator and spouse status<sup>1</sup>

|                        | Applicator |                         | Spouse   |                         |
|------------------------|------------|-------------------------|----------|-------------------------|
|                        | RA Cases   |                         | RA Cases |                         |
|                        | N=196      |                         | N=231    |                         |
| Raised for income      | N (%)      | HR <sup>2</sup> (95%CI) | N (%)    | HR <sup>2</sup> (95%CI) |
| Crops only, ≤62        | 69 (35)    | Referent                | 59 (26)  | Referent                |
| >62                    |            |                         | 29 (13)  | Referent                |
| Animals only, ≤62      | 2 (1)      | NA                      | 2 (1)    | NA                      |
| >62                    |            |                         | 3 (1)    | NA                      |
| Both, ≤62              | 108 (55)   | 0.91 (0.66 to 1.26)     | 84 (36)  | 0.66 (0.46 to 0.95)     |
| >62                    |            |                         | 36 (16)  | 0.89 (0.54 to 1.48)     |
| Neither, ≤62           | 17 (9)     | 1.35 (0.78 to 2.33)     | 11 (7)   | 0.86 (0.44 to 1.66)     |
| >62                    |            |                         | 7 (9)    | 1.06 (0.25 to 4.46)     |
| Crops <sup>3</sup>     |            |                         |          |                         |
| Alfalfa                | 48 (24)    | 1.25 (0.88 to 1.81)     | 57 (25)  | 1.27 (0.91 to 1.77)     |
| Field corn, ≤62        | 145 (74)   | 1.06 (0.70 to 1.61)     | 113 (72) | 0.86 (0.54 to 1.37)     |
| >62                    |            |                         | 57 (77)  | 2.16 (1.15 to 4.08)     |
| Hay, ≤62               | 29 (15)    | 0.64 (0.42 to 0.98)     | 69 (30)  | 0.89 (0.67 to 1.20)     |
| >62                    | 30 (15)    | 1.50 (0.92 to 2.43)     |          |                         |
| Oats                   | 48 (24)    | 1.18 (0.83 to 1.66)     | 48 (21)  | 0.96 (0.68 to 1.35)     |
| Soybeans, ≤62          | 134 (68)   | 0.91 (0.63 to 1.32)     | 104 (66) | 0.84 (0.57 to 1.25)     |
| >62                    |            |                         | 51 (69)  | 1.56 (0.88 to 2.78)     |
| Sweet corn             | 24 (12)    | 1.49 (0.95 to 2.28)     | 21 (9)   | 1.05 (0.66 to 1.69)     |
| Wheat                  | 19 (10)    | 0.59 (0.34 to 0.99)     | 31 (13)  | 1.25 (0.83 to 1.91)     |
| Livestock <sup>2</sup> |            |                         |          |                         |
| Beef cattle            | 65 (33)    | 0.80 (0.59 to 1.09)     | 78 (34)  | 0.80 (0.60 to 1.07)     |
| Hogs                   | 59 (30)    | 0.92 (0.65 to 1.29)     | 69 (30)  | 0.91 (0.67 to 1.25)     |

<sup>1</sup>Numbers shown are for those with complete data on pesticide covariates and diagnosis age for enrolled applicators (196 cases and 24357 non-cases) and spouses (231 cases and 20842 non-cases)

<sup>2</sup>Hazard ratios (HR) and 95% confidence intervals (CI) estimated by cox proportional hazards model adjusting for state, participant type (applicator/spouse), smoking pack-years, education, and pesticides; not applicable (NA) for less than 5 exposed cases. Hazard ratios allowed to vary by the median age (i.e., 62 years) when proportional hazards assumption was not met ( $p \leq 0.10$ ).

<sup>3</sup>Common crops or livestock (with 10% cases exposed).

Supplemental Table 2. Incident RA in relation to crops and livestock at enrollment, stratified by state<sup>1</sup>

| Raised for income      | Iowa     |                         | NC       |                         |
|------------------------|----------|-------------------------|----------|-------------------------|
|                        | RA Cases |                         | RA Cases |                         |
|                        | N=251    |                         | N=176    |                         |
|                        | N (%)    | HR <sup>2</sup> (95%CI) | N (%)    | HR <sup>2</sup> (95%CI) |
| Crops only             | 69 (27)  | Reference               | 88 (50)  | Reference               |
| Animals only           | 4 (2)    | NA                      | 3 (2)    | NA                      |
| Both                   | 173 (68) | 0.84 (0.63 to 1.12)     | 55 (31)  | 0.81 (0.57 to 1.15)     |
| Neither                | 5 (2)    | 0.94 (0.38 to 2.34)     | 30 (17)  | 1.04 (0.68 to 1.59)     |
| Crops <sup>3</sup>     |          |                         |          |                         |
| Alfalfa                | 100 (40) | 1.34 (1.00 to 1.69)     | 5 (3)    | 0.87 (0.36 to 2.12)     |
| Field corn             | 238 (94) | 1.04 (0.59 to 1.82)     | 77 (44)  | 1.16 (0.84 to 1.61)     |
| Hay, ≤62               | 55 (22)  | 0.77 (0.55 to 1.08)     | 35 (20)  | 0.82 (0.56 to 1.20)     |
| >62                    | 38 (15)  | 1.38 (0.88 to 2.14)     |          |                         |
| Oats                   | 89 (35)  | 1.24 (0.95 to 1.62)     | 7 (4)    | 0.44 (0.31 to 0.94)     |
| Peanuts                | 0 (0)    | NA                      | 20 (11)  | 0.97 (0.58 to 1.60)     |
| Soybeans               | 216 (86) | 0.96 (0.67 to 1.39)     | 73 (42)  | 0.98 (0.71 to 1.37)     |
| Sweet corn             | 24 (9)   | 1.45 (0.94 to 2.22)     | 21 (12)  | 1.05 (0.66 to 1.70)     |
| Tobacco                | 0 (0)    | NA                      | 62 (35)  | 0.77 (0.57 to 1.07)     |
| Wheat                  | 5 (2)    | 0.85 (0.35 to 2.08)     | 45 (26)  | 0.89 (0.62 to 1.28)     |
| Livestock <sup>2</sup> |          |                         |          |                         |
| Beef cattle            | 101 (40) | 0.76 (0.59 to 0.99)     | 52 (25)  | 0.85 (0.60 to 1.21)     |
| Hogs, ≤62              | 86 (34)  | 0.86 (0.63 to 1.17)     | 10 (6)   | 0.58 (0.29 to 1.13)     |
| >62                    | 32 (13)  | 1.10 (0.70 to 1.73)     |          |                         |

<sup>1</sup>Numbers shown are for those with complete data on pesticide covariates and diagnosis age for all enrolled applicators and spouses, including 251 cases and 32047 non-cases from IA, and 176 cases and 13152 non-cases from NC.

<sup>2</sup>Hazard ratios (HR) and 95% confidence intervals (CI) estimated by cox proportional hazards model adjusting for state, participant type (applicator/spouse), smoking pack-years, education, and pesticides; not applicable (NA) for less than 5 exposed cases. Hazard ratios allowed to vary by the median age (i.e., 62 years) when proportional hazards assumption was not met ( $p \leq 0.10$ ).

<sup>3</sup>Common crops or livestock (with 10% cases exposed).



Supplemental Table 3. Incident RA and farm tasks reported by applicators at enrollment, by state<sup>1</sup>

| Tasks (at least once per year) | Iowa     |                         | North Carolina |                         |
|--------------------------------|----------|-------------------------|----------------|-------------------------|
|                                | RA cases |                         | RA cases       |                         |
|                                | N=113    |                         | N=83           |                         |
|                                | N (%)    | HR (95%CI) <sup>2</sup> | N (%)          | HR (95%CI) <sup>2</sup> |
| Veterinary services            | 72 (64)  | 0.78 (0.52 to 1.16)     | 25 (30)        | 0.89 (0.54 to 1.44)     |
| Butcher animals                | 15 (13)  | 1.04 (0.59 to 1.82)     | 14 (17)        | 0.92 (0.51 to 1.68)     |
| Work in swine areas            | 45 (40)  | 1.06 (0.69 to 1.50)     | 7 (8)          | 0.87 (0.37 to 2.03)     |
| Work in poultry areas          | 2 (2)    | NA                      | 3 (4)          | NA                      |
| Load/unload silage             | 36 (32)  | 1.09 (0.72 to 1.64)     | 7 (8)          | 1.29 (0.58 to 2.85)     |
| Grind animal feed              | 77 (68)  | 1.26 (0.84 to 1.90)     | 15 (18)        | 0.82 (0.45 to 1.47)     |
| Handle stored grain            | 102 (90) | 0.96 (0.51 to 1.81)     | 31 (37)        | 0.91 (0.56 to 1.48)     |
| Handle stored hay              | 75 (66)  | 0.94 (0.63 to 1.40)     | 33 (40)        | 0.86 (0.55 to 1.35)     |
| Repair engines                 | 55 (49)  | 1.17 (0.78 to 1.71)     | 37 (45)        | 1.00 (0.64 to 1.56)     |
| Replace asbestos brakes        | 18 (16)  | 1.12 (0.67 to 1.70)     | 22 (26)        | 1.34 (0.81 to 2.19)     |
| Weld, ≤62                      | 57 (50)  | 0.60 (0.33 to 1.06)     | 42 (51)        | 0.87 (0.55 to 1.37)     |
| >62                            | 36 (32)  | 2.23 (0.86 to 5.78)     |                |                         |
| Paint, ≤62                     | 58 (51)  | 0.91 (0.51 to 1.65)     | 45 (54)        | 0.89 (0.55 to 1.37)     |
| >62                            | 33 (29)  | 1.72 (0.76 to 3.91)     |                |                         |
| Repair pesticide equipment     | 82 (73)  | 1.10 (0.72 to 1.69)     | 49 (59)        | 0.79 (0.49 to 1.29)     |

<sup>1</sup> Numbers shown are for those with complete data on pesticide covariates and diagnosis age for applicators who completed the enrollment questionnaire, including 113 cases and 17438 non-cases from IA and 83 cases and 6919 non-cases from NC.

<sup>2</sup>Hazard ratios (HR) and 95% confidence intervals (CI) estimated by cox proportional hazards model adjusting for state, participant type (applicator/spouse), smoking pack-years, education, and pesticides;

not applicable (NA) for less than 5 exposed cases. Hazard ratios allowed to vary by the median age (i.e., 62 years) when proportional hazards assumption was not met ( $p \leq 0.10$ ).

Supplemental Table 4. Incident RA in relation to the frequency of field work and other farm tasks performed regularly by applicators<sup>1</sup>

|                                       | RA cases<br>N=120<br>N (%) | Overall<br>HR (95% CI) <sup>2</sup> | p-value |
|---------------------------------------|----------------------------|-------------------------------------|---------|
| <b>Regular field work</b>             |                            |                                     |         |
| Till the soil (plow, disc, cultivate) |                            |                                     |         |
| Never                                 | 6 (5)                      | .                                   | .       |
| 1-10 days                             | 31 (27)                    | 1.36 (0.56 to 3.27)                 | 0.50    |
| 11-30 days                            | 48 (41)                    | 1.32 (0.55 to 3.17)                 | 0.53    |
| 31-100 days                           | 27 (23)                    | 1.24 (0.50 to 3.07)                 | 0.64    |
| More than 100 days                    | 5 (4)                      | 1.42 (0.43 to 4.77)                 | 0.57    |
| <i>P-trend</i>                        |                            | 0.86                                |         |
| Planting                              |                            |                                     |         |
| Never                                 | 7 (6)                      | .                                   | .       |
| 1-10 days                             | 32 (27)                    | 1.36 (0.60 to 3.09)                 | 0.46    |
| 11-30 days                            | 68 (58)                    | 1.30 (0.59 to 2.86)                 | 0.52    |
| More than 30 days                     | 10 (9)                     | 1.24 (0.46 to 3.30)                 | 0.67    |
| <i>P-trend</i>                        |                            | 0.82                                |         |
| Apply natural fertilizer (manure)     |                            |                                     |         |
| Never                                 | 45 (39)                    | .                                   | .       |
| 1-5 days                              | 30 (26)                    | 1.13 (0.70 to 1.81)                 | 0.63    |
| 6-25 days                             | 23 (20)                    | 0.95 (0.55 to 1.63)                 | 0.85    |
| 26-50 days                            | 9 (8)                      | 1.06 (0.48 to 2.34)                 | 0.89    |
| More than 50 days                     | 8 (7)                      | 1.64 (0.74 to 3.66)                 | 0.23    |
| <i>P-trend</i>                        |                            | 0.50                                |         |
| Apply chemical fertilizer             |                            |                                     |         |
| Never                                 | 17 (15)                    | .                                   | .       |
| 1-5 days                              | 50 (43)                    | 1.16 (0.66 to 2.05)                 | 0.60    |
| 6-25 days                             | 43 (37)                    | 1.34 (0.75 to 2.41)                 | 0.33    |
| More than 25 days                     | 7 (6)                      | 1.59 (0.64 to 3.96)                 | 0.32    |
| <i>P-trend</i>                        |                            | 0.25                                |         |
| Handpick crops                        |                            |                                     |         |
| Never                                 | 70 (60)                    | .                                   | .       |
| 1-5 days                              | 29 (25)                    | 1.30 (0.82 to 2.06)                 | 0.26    |
| 6-25 days                             | 13 (11)                    | 1.36 (0.70 to 2.62)                 | 0.36    |
| More than 25 days                     | 4 (3)                      | NA                                  | 0.31    |
| <i>P-trend</i>                        |                            | 0.96                                |         |
| <b>Other regular tasks</b>            |                            |                                     |         |
| Drive trucks                          |                            |                                     |         |
| Never or less than once a month       | 33 (28)                    | .                                   | .       |
| Monthly                               | 20 (17)                    | 1.03 (0.59 to 1.82)                 | 0.91    |

|                                 |                |          |                     |       |
|---------------------------------|----------------|----------|---------------------|-------|
|                                 | Weekly         | 63 (54)  | 1.02 (0.65 to 1.61) | 0.93  |
|                                 | <i>P-trend</i> |          | 0.91                |       |
| Drive a diesel tractor          |                |          |                     |       |
| Never or less than once a month |                | 10 (8)   | .                   | .     |
| Monthly                         |                | 5 (4)    | 0.57 (0.19 to 1.67) | 0.30  |
| Weekly                          |                | 103 (87) | 1.14 (0.57 to 2.30) | 0.71  |
|                                 | <i>P-trend</i> |          | 0.91                |       |
| Drive a gas tractor             |                |          |                     |       |
| Never or less than once a month |                | 42 (36)  | .                   | .     |
| Monthly                         |                | 30 (26)  | 0.86 (0.53 to 1.40) | 0.55  |
| Weekly                          |                | 45 (38)  | 0.74 (0.47 to 1.14) | 0.17  |
|                                 | <i>P-trend</i> |          | 0.17                |       |
| Welding                         |                |          |                     |       |
| Never or less than once a month |                | 37 (32)  | .                   | .     |
| Monthly                         |                | 52 (44)  | 1.33 (0.84 to 2.09) | 0.22  |
| Weekly                          |                | 28 (24)  | 1.52 (0.90 to 2.57) | 0.12  |
|                                 | <i>P-trend</i> |          | 0.13                |       |
| Repair engines                  |                |          |                     |       |
| Never or less than once a month |                | 61 (52)  | .                   | .     |
| Monthly                         |                | 47 (40)  | 1.29 (0.87 to 1.90) | 0.21  |
| Weekly                          |                | 9 (8)    | 1.33 (0.66 to 2.70) | 0.43  |
|                                 | <i>P-trend</i> |          | 0.20                |       |
| Grind metal                     |                |          |                     |       |
| Never or less than once a month |                | 35 (30)  | .                   | .     |
| Monthly                         |                | 56 (48)  | 1.12 (0.72 to 1.75) | 0.61  |
| Weekly                          |                | 25 (22)  | 1.09 (0.64 to 1.89) | 0.75  |
|                                 | <i>P-trend</i> |          |                     | 0.71  |
| Use gasoline to clean           |                |          |                     |       |
| Never or less than once a month |                | 70 (60)  | .                   | .     |
| Monthly                         |                | 39 (33)  | 1.04 (0.69 to 1.55) | 0.87  |
| Weekly                          |                | 8 (7)    | 0.99 (0.45 to 2.15) | 0.97  |
|                                 | <i>P-trend</i> |          | 0.93                |       |
| Use other solvents to clean     |                |          |                     |       |
| Never or less than once a month |                | 83 (71)  | .                   | .     |
| Monthly                         |                | 27 (23)  | 1.17 (0.75 to 1.82) | 0.48  |
| Weekly                          |                | 7 (6)    | 1.83 (0.84 to 3.98) | 0.13  |
|                                 | <i>P-trend</i> |          | 0.15                |       |
| Painting                        |                |          |                     |       |
| Never or less than once a month |                | 72 (61)  | .                   | .     |
| Monthly                         |                | 40 (34)  | 0.89 (0.60 to 1.33) | 0.58  |
| Weekly                          |                | 6 (5)    | 2.55 (1.10 to 5.89) | 0.029 |
|                                 | <i>P-trend</i> |          | 0.58                |       |

<sup>1</sup>Results shown are for those with complete data on pesticides covariates and diagnosis age for applicators who completed the “take-home” questionnaire, including 120 cases and 13436 non-cases; Numbers may not add to total due to missing values on individual exposures.

<sup>2</sup>Hazard model adjusted for participant type (applicator/spouse), smoking pack-years, education, and pesticides; not applicable (NA) for less than 5 exposed cases. Proportional hazards assumption was not met ( $p \leq 0.10$ ) for driving combines or mechanical harvesters, performing veterinary procedures, and grinding feed (see Supplemental Table 5).

Supplemental Table 5. Proportional hazards for selected field work and other farm tasks in applicators, stratified by median age

|                                       |                                 | Under age 62 years        |                     |         | Over age 62 years         |                     |         |
|---------------------------------------|---------------------------------|---------------------------|---------------------|---------|---------------------------|---------------------|---------|
|                                       |                                 | RA cases<br>N=65<br>N (%) | HR (95% CI)         | p-value | RA cases<br>N=55<br>N (%) | HR (95% CI)         | p-value |
| <b>Field tasks (days per year)</b>    |                                 |                           |                     |         |                           |                     |         |
| Drive a combine or harvest by machine |                                 |                           |                     |         |                           |                     |         |
|                                       | Never                           | 17 (27)                   | Referent            |         | 8 (16)                    | Referent            |         |
|                                       | 1-5 days                        | 16 (25)                   | 0.87 (0.41 to 1.84) | 0.72    | 10 (20)                   | 2.15 (0.82 to 5.68) | 0.12    |
|                                       | 6-25 days                       | 20 (31)                   | 0.48 (0.22 to 1.03) | 0.059   | 21 (41)                   | 2.54 (0.99 to 6.55) | 0.054   |
|                                       | More than 25 days               | 11 (17)                   | 0.45 (0.19 to 1.09) | 0.078   | 12 (24)                   | 3.03 (1.09 to 8.45) | 0.034   |
|                                       | <i>P-trend</i>                  |                           | 0.028               |         |                           | 0.037               |         |
| <b>Other regular tasks</b>            |                                 |                           |                     |         |                           |                     |         |
| Perform veterinary procedures         |                                 |                           |                     |         |                           |                     |         |
|                                       | Never or less than once a month | 42 (66)                   | Referent            |         | 33 (62)                   | Referent            |         |
|                                       | Monthly                         | 13 (20)                   | 0.59 (0.30 to 1.16) | 0.13    | 14 (26)                   | 1.33 (0.67 to 2.62) | 0.42    |
|                                       | Weekly                          | 9 (14)                    | 0.98 (0.46 to 2.09) | 0.96    | 6 (11)                    | 2.25 (0.90 to 5.63) | 0.084   |
|                                       | <i>P-trend</i>                  |                           | 0.55                |         |                           | 0.092               |         |
| Grind animal feed                     |                                 |                           |                     |         |                           |                     |         |
|                                       | Never or less than once a month | 38 (59)                   | Referent            |         | 30 (57)                   | Referent            |         |
|                                       | Monthly                         | 4 (6)                     | 0.61 (0.21 to 1.73) | 0.35    | 8 (15)                    | 1.93 (0.86 to 4.39) | 0.11    |
|                                       | Weekly                          | 22 (34)                   | 1.19 (0.63 to 2.22) | 0.59    | 25 (28)                   | 1.86 (0.87 to 3.97) | 0.11    |
|                                       | <i>P-trend</i>                  |                           | 0.66                |         |                           | 0.082               |         |

<sup>1</sup>Results shown are for those with complete data on pesticides covariates and diagnosis age for applicators who completed the “take-home” questionnaire, including those 62 and younger (65 cases and 6129 non-cases) and over the age of 62 (55 cases and 7325 non-cases). Numbers may not add to total due to missing responses for individual exposures.

<sup>2</sup>Hazard model adjusted for participant type (applicator/spouse), smoking pack-years, education, and pesticides.

<sup>2</sup>Proportional hazards assumption was not met ( $p \leq 0.10$ )

Supplemental Table 6. Incident RA in relation to regular field work and other farm tasks in spouses

|                                   | RA Cases<br>N=231<br>N (%) | Spouses <sup>1</sup><br><br>HR (95% CI) <sup>2</sup> | P-value |
|-----------------------------------|----------------------------|------------------------------------------------------|---------|
| <b>Regular field work</b>         |                            |                                                      |         |
| Till soil (cultivate, disc, plow) | 52 (23)                    | 0.93 (0.66 to 1.29)                                  | 0.65    |
| Plant                             | 73 (32)                    | 1.30 (0.96 to 1.76)                                  | 0.09    |
| Use natural fertilizer (manure)   | 35 (15)                    | 1.14 (0.78 to 1.68)                                  | 0.49    |
| Use chemical fertilizer           | 45 (20)                    | 1.67 (1.17 to 2.38)                                  | 0.005   |
| Drive combines                    | 26 (11)                    | 1.07 (0.69 to 1.66)                                  | 0.76    |
| Handpick crops                    | 68 (30)                    | 1.11 (0.82 to 1.51)                                  | 0.49    |
| <b>Other regular tasks</b>        |                            |                                                      |         |
| Milk cows                         | 5 (2)                      | 0.76 (0.31 to 1.87)                                  | 0.56    |
| Vet procedures                    | 24 (11)                    | 0.91 (0.58 to 1.42)                                  | 0.65    |
| Grind feed                        | 14 (6)                     | 1.11 (0.63 to 1.96)                                  | 0.72    |
| Drive trucks                      | 75 (36)                    | 0.86 (0.64 to 1.15)                                  | 0.30    |
| Diesel tractor                    | 69 (32)                    | 0.88 (0.64 to 1.20)                                  | 0.41    |
| Gasoline tractor                  | 60 (27)                    | 1.00 (0.73 to 1.37)                                  | 0.99    |
| Welding                           | 3 (1)                      | NA                                                   | ---     |
| Repairing engines                 | 3 (1)                      | NA                                                   | ---     |
| Grind metal                       | 6 (3)                      | 1.78 (0.73 to 4.32)                                  | 0.20    |
| Use gasoline to clean             | 36 (17)                    | 1.06 (0.72 to 1.56)                                  | 0.77    |
| Use other solvents to clean       | 57 (27)                    | 1.46 (1.06 to 2.01)                                  | 0.022   |
| Painting                          | 86 (39)                    | 1.42 (1.07 to 1.89)                                  | 0.017   |



---

---

<sup>1</sup>Results shown for those with complete data on pesticides covariates and diagnosis age for enrolled spouses available for 231 cases and 20842 non-cases.

<sup>2</sup>Hazard ratios (HR) and 95% confidence intervals (CI) estimated by cox proportional hazards model adjusting for state, participant type (applicator/spouse), smoking pack-years, education, and pesticides; not applicable (NA) for less than 5 exposed cases. Hazard ratios allowed to vary by the median age (i.e., 62 years) when proportional hazards assumption was not met ( $p \leq 0.10$ ).

Supplemental Table 7. Incident RA in relation to regular field work and other farm tasks in applicators and spouses, stratified by state<sup>1</sup>

|                                          | Iowa     |                          |         | North Carolina |                          |         |
|------------------------------------------|----------|--------------------------|---------|----------------|--------------------------|---------|
|                                          | RA Cases |                          |         | RA Cases       |                          |         |
|                                          | N=204    |                          |         | N=147          |                          |         |
|                                          | N (%)    | HR (95% CI) <sup>2</sup> | P-value | N (%)          | HR (95% CI) <sup>2</sup> | P-value |
| <b>Regular field work</b>                |          |                          |         |                |                          |         |
| Till soil (cultivate, disc, plow)        | 100 (50) | 0.86 (0.59 to 1.25)      | 0.44    | 63 (44)        | 1.22 (0.75 to 2.00)      | 0.43    |
| Plant                                    | 86 (43)  | 1.16 (0.77 to 1.75)      | 0.49    | 97 (66)        | 1.43 (0.97 to 2.12)      | 0.073   |
| Use natural fertilizer (manure)          | 66 (33)  | 1.17 (0.78 to 1.76)      | 0.45    | 10 (8)         | 1.04 (0.71 to 1.54)      | 0.83    |
| Use chemical fertilizer                  | 72 (36)  | 1.61 (1.02 to 2.53)      | 0.039   | 73 (50)        | 1.46 (0.97 to 2.21)      | 0.072   |
| Drive combines, ≤62 years <sup>4</sup>   | 85 (43)  | 1.22 (0.80 to 1.85)      | 0.36    | 13 (9)         | 0.46 (0.21 to 1.03)      | 0.060   |
| >62 years                                |          |                          |         | 18 (12)        | 1.71 (0.78 to 3.78)      | 0.18    |
| Handpick crops                           | 33 (16)  | 0.96 (0.65 to 1.40)      | 0.82    | 81 (56)        | 1.33 (0.94 to 1.87)      | 0.11    |
| <b>Other regular tasks</b>               |          |                          |         |                |                          |         |
| Milk cows                                | 10 (5)   | 1.07 (0.56 to 2.04)      | 0.83    | 2 (1)          | NA                       | ---     |
| Vet procedures, ≤62 years <sup>4</sup>   | 52 (27)  | 0.93 (0.65 to 1.37)      | 0.69    | 5 (3)          | 0.53 (0.21 to 1.36)      | 0.19    |
| >62 years                                |          |                          |         | 9 (6)          | 1.86 (0.84 to 4.16)      | 0.13    |
| Grind feed, ≤62 years <sup>4</sup>       | 63 (19)  | 1.14 (0.82 to 1.59)      | 0.43    | 2 (1)          | NA                       | --      |
| >62 years                                |          |                          |         | 7 (5)          | 1.80 (0.72 to 4.50)      | 0.21    |
| Drive trucks                             | 80 (41)  | 0.85 (0.62 to 1.15)      | 0.29    | 78 (56)        | 1.00 (0.69 to 1.48)      | 0.98    |
| Diesel tractor, ≤62 years <sup>4</sup>   | 116 (58) | 0.89 (0.63 to 1.27)      | 0.54    | 31 (38)        | 0.55 (0.30 to 1.01)      | 0.055   |
| >62 years                                |          |                          |         | 30 (53)        | 1.55 (0.77 to 3.12)      | 0.22    |
| Gasoline tractor, ≤62 years <sup>4</sup> | 68 (33)  | 1.40 (0.96 to 2.05)      | 0.079   | 19 (24)        | 0.63 (0.36 to 1.09)      | 0.097   |
| >62 years                                | 28 (14)  | 0.55 (0.31 to 0.97)      | 0.039   | 20 (35)        | 1.04 (0.56 to 1.94)      | 0.89    |
| Welding                                  | 54 (27)  | 1.28 (0.73 to 2.24)      | 0.38    | 28 (20)        | 1.23 (0.71 to 2.11)      | 0.47    |
| Repairing engines                        | 36 (18)  | 1.28 (0.81 to 2.03)      | 0.29    | 23 (17)        | 1.07 (0.63 to 1.83)      | 0.79    |
| Grind metal                              | 58 (29)  | 1.49 (0.83 to 2.62)      | 0.18    | 29 (21)        | 0.93 (0.54 to 1.62)      | 0.89    |
| Use gasoline to clean                    | 58 (32)  | 0.98 (0.71 to 1.37)      | 0.92    | 25 (19)        | 1.18 (0.73 to 1.90)      | 0.50    |
| Use other solvents to clean              | 62 (32)  | 1.31 (0.96 to 1.78)      | 0.088   | 29 (21)        | 1.47 (0.96 to 2.27)      | 0.078   |

|          |         |                     |      |         |                     |       |
|----------|---------|---------------------|------|---------|---------------------|-------|
| Painting | 88 (44) | 1.11 (0.83 to 1.48) | 0.48 | 44 (32) | 1.50 (1.03 to 2.18) | 0.033 |
|----------|---------|---------------------|------|---------|---------------------|-------|

<sup>1</sup> Numbers shown are for those with complete data on pesticide covariates and diagnosis age for applicators with the take-home questionnaire and spouses, including 204 cases and 24444 non-cases from IA, and 147 cases and 9851 non-cases from NC.

<sup>2</sup>Hazard model adjusted for participant type (applicator/spouse), smoking pack-years, education, and pesticides; not applicable (NA) for less than 5 exposed cases. Hazard ratios allowed to vary by the median age (i.e., 62 years) when proportional hazards assumption was not met ( $p \leq 0.10$ )

Supplemental Table 8. Incident RA in relation to combined tasks: planting and chemical fertilizers, solvents and painting

|                                             |                 | Overall <sup>1</sup> |                          |         | Applicators only  |                          |         |
|---------------------------------------------|-----------------|----------------------|--------------------------|---------|-------------------|--------------------------|---------|
|                                             |                 | RA cases<br>N=351    |                          |         | RA cases<br>N=120 |                          |         |
|                                             |                 | N (%)                | HR (95% CI) <sup>2</sup> | p-value |                   | HR (95% CI) <sup>2</sup> | p-value |
| <b>Planting and chemical fertilizer use</b> |                 |                      |                          |         |                   |                          |         |
|                                             | Neither         | 157 (45)             | Referent                 |         | 4 (3)             | Referent                 |         |
|                                             | Planting only   | 44 (13)              | 1.02 (0.72 to 1.45)      | 0.91    | 13 (11)           | NA                       | ---     |
|                                             | Fertilizer only | 8 (2)                | 1.36 (0.66 to 2.81)      | 0.41    | 3 (3)             | NA                       | ---     |
|                                             | Both            | 137 (39)             | 1.53 (1.10 to 2.14)      | 0.013   | 97 (83)           | NA                       | ---     |
| <b>Painting and solvent use</b>             |                 |                      |                          |         |                   |                          |         |
|                                             | Neither         | 190 (57)             | Referent                 |         | 61 (52)           |                          |         |
|                                             | Painting only   | 51 (15)              | 1.07 (0.77 to 1.47)      | 0.70    | 22 (19)           | 0.88 (0.53 to 1.46)      | 0.61    |
|                                             | Solvents only   | 15 (4)               | 1.34 (0.78 to 2.33)      | 0.77    | 11 (9)            | 1.41 (0.74 to 2.69)      | 0.30    |
|                                             | Both            | 76 (23)              | 1.44 (1.09 to 1.90)      | 0.009   | 23 (20)           | 1.13 (0.70 to 1.86)      | 0.59    |

<sup>1</sup>Results shown for combined sample of applicators who completed the “take home” questionnaire (120 cases and 13436 non-cases) and enrolled spouses (231 cases and 20842 non-cases). Numbers may not add to total due to missing responses for individual exposures.

<sup>2</sup>Hazard model adjusted for participant type (applicator/spouse), smoking pack-years, education, and pesticides; not applicable (NA) for less than 5 exposed cases. Hazard ratios allowed to vary by the median age (i.e., 62 years) when proportional hazards assumption was not met ( $p \leq 0.10$ )
